# Supplementary material for: Trust and task-sharing: the acceptability of nurses and peer educators in PrEP delivery among sexually and gender-diverse adolescents in Brazil
Source: Research Square preprint supplement (doi:10.21203/rs.3.rs-9040931/v1), 2026-04-15
Supplement: Supplementary file 1 [file 16838e5eb38f5364fabbb69a.docx]

# **Additional file 2. Semi-structured interview guide used with healthcare professionals (English version)**

This file presents the semi-structured interview guide used in the qualitative data collection with healthcare professionals involved in the provision of pre-exposure prophylaxis (PrEP). The guide explored participants’ professional trajectories, perceptions of combination HIV prevention, experiences in PrEP service delivery, interprofessional work processes, and perspectives on task-sharing in PrEP care, including the potential introduction of injectable PrEP.

## Introduction

Hello, today we will talk about your role in the management of PrEP and your work with service users.

## 1. Socioeconomic and professional background

Name
Date of birth (age)

Self-identification: How do you identify in relation to your:

- Race/skin color
- Gender identity
- Sexual orientation/identity

Please tell me about the path that led you to work in HIV/STI prevention. How did you start working in this area?

Probes

- Current professional position (job title)
- Professional satisfaction with working in this field
- Whether working in this area was planned or not

## 2. Perceptions of combination HIV prevention and PrEP

What comes to your mind when you think about HIV prevention in Brazil today?

Do you think PrEP has contributed to addressing the HIV epidemic? In what ways?

Probes

- Importance and role of PrEP within combination prevention strategies
- Positive and negative perceptions regarding prevention methods and strategies, with emphasis on PrEP
- Perceptions regarding the role of individuals in addressing the epidemic (e.g., presence of blame or moral judgment)

## 3. Work processes and professional relationships

Please tell me about your work routine related to PrEP.

How does teamwork occur in your service regarding PrEP management?

Probes

- Relationship with other professional peers
- Relationship with managers
- Multiprofessional collaboration (how it occurs, positive and negative aspects)

Please tell me about your relationship with service users regarding PrEP.

Probes

- Positive aspects (please feel free to describe situations that come to mind)
- Challenging situations (please feel free to describe situations that come to mind)

## 4. PrEP care provided by different professionals

What do you think about nursing professionals providing PrEP care and prescribing PrEP?

What do you think about peer educators providing PrEP care and prescribing PrEP?

How do you think the response to the HIV epidemic would be affected by the involvement of non-physician professionals in PrEP care and prescription?

How do you think your own work would be affected by this model? Why?

Probes

- Positive and negative aspects
- Workload implications
- Availability of material and institutional resources

What do you think should be ensured so that nurses and peer educators can adequately perform this work?

Probes

- Need for professional training
- Need for adequate material resources
- Need for appropriate physical spaces
- Need for modifications in work processes

How do you think other health professionals would respond to non-physician professionals performing this role?

Probes

- Positive and negative aspects
- Possible tensions between professional groups

How do you think service users would respond to nurses and peer educators performing this role?

Probes

- Positive and negative aspects
- Continuity of PrEP treatment
- Relationship with HIV prevention strategies

Do you think there are more user-friendly ways for the population you serve to receive PrEP?

Probes

- Professional experiences in other services
- Comparison between experiences
- Whether the location of PrEP dispensing may influence treatment discontinuation

## 5. Perspectives on the inclusion of injectable PrEP

What do you think about injectable PrEP?

What do you think about the possibility of prescribing and dispensing injectable PrEP?

Probes

- Positive aspects
- Negative aspects
- Possible reactions from other professionals
- Possible reactions from service users

## Final considerations

Please feel free to add any additional information that you consider relevant.
