# Supplementary material for: Trust and task-sharing: the acceptability of nurses and peer educators in PrEP delivery among sexually and gender-diverse adolescents in Brazil
Source: Research Square preprint supplement (doi:10.21203/rs.3.rs-9040931/v1), 2026-04-15
Supplement: Supplementary file 2 [file 89a03eafd366869371bf121d.docx]

**Additional file 1. Semi-structured interview guide used with PrEP clients (English version).**

This file presents the semi-structured interview guide used in the qualitative data collection with PrEP users. The guide explored participants’ socioeconomic characteristics, experiences with PrEP use, access to services, perceptions of care provided by nurses and peer educators, and perspectives on the potential introduction of injectable PrEP.

## Introduction

Hello, today we are going to talk about your experience receiving PrEP care from different health professionals, especially nurses and peer educators.

1. Socioeconomic identification

Name
Date of birth (age)

Self-identification: How do you identify in relation to your:

- Race/skin color
- Gender identity
- Sexual identity/orientation

Until which year did you study?

Probe:

- Educational level
- Professional or training courses completed

What is your occupation? What do you currently do for work?

Please tell me about where you live and who you live with.

Probe:

- Housing conditions, neighbourhood, community
- Household composition

If you feel comfortable sharing, what is your approximate monthly income? Does anyone else depend on or benefit from your income?

## 2. Experience with PrEP use

Can you tell me how you first heard about PrEP?

Probe:

- How did you learn about PrEP?
- At what moment in your life did PrEP become an option for you?

How long have you been using PrEP? Have you ever interrupted its use?

How has your experience been using PrEP as a strategy for HIV prevention?

## 3. Experience accessing and using the health service

Please tell me how you came to the health service seeking PrEP care.

Probe:

- The path taken until reaching the health service
- Barriers encountered when accessing care
- Facilitators that helped you access the service

Please describe how your follow-up for PrEP use takes place in the health service.

How has your experience been in this service?

Probe:

- Relationship with health professionals
- Relationship with other service users
- Whether you have ever felt embarrassed or discriminated against in the service

What is your perception of receiving PrEP care in a non-specialized health service?

## 4. Experience with PrEP care provided by nursing professionals

Let us talk about the role of nurses in prescribing and managing PrEP. The nurse is the professional who attends your scheduled appointments and prescribes PrEP. Please note that this consultation is different from a medical consultation.

What is it like for you to receive PrEP care from a nurse?

Probe:

- Acceptability of this model of care
- Possible concerns or fears related to not having a physician managing clinical care

Do you feel confident in the nursing professional to provide your PrEP care?

Probe:

- Aspects related to trust and the relationship between the user and the professional

In your perception, are there differences between care provided by physicians and nurses?

Probe:

- Continuity of care
- Ways in which nursing care may facilitate access to and adherence to PrEP

For you, what is it like to have your treatment supported by a peer educator (São Paulo) or a peer navigator (Salvador)?

Probe:

- Relationship, support, and sense of welcome

What do you think about the possibility of peer educators performing what nurses currently do, such as prescribing PrEP?

## 5. Perspectives on injectable PrEP

What do you think about injectable PrEP?

What are your thoughts about the possibility of receiving injectable PrEP from nurses or peer educators?

Probe:

- Positive aspects
- Negative aspects

## Final considerations

Please feel free to add any additional information that you consider relevant.
